# Supplementary material
Source: PubMed Central journal article supplement (PMC4455276)
Supplement: JB.00193-15_zjb999093645so1.pdf [file JB.00193-15_zjb999093645so1.pdf]

## Supplemental materials for

# “The cAMP-Vfr signaling pathway in *Pseudomonas aeruginosa* is inhibited by c-di-GMP.”

Figure S1

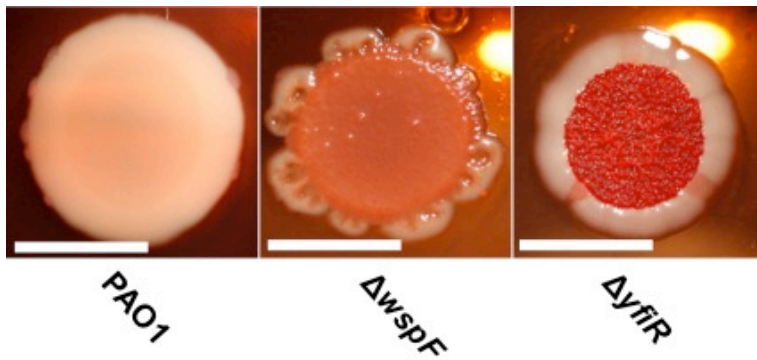

**Figure S1. Congo Red Binding of RSCVs *P. aeruginosa***

PAO1 wild type, and  $\Delta wspF$  and  $\Delta yfiR$  spotted onto tryptone-Congo red agar plates with 1% arabinose. Cells were grown for 5 days at RT. Bar = 5mm.

Figure S2

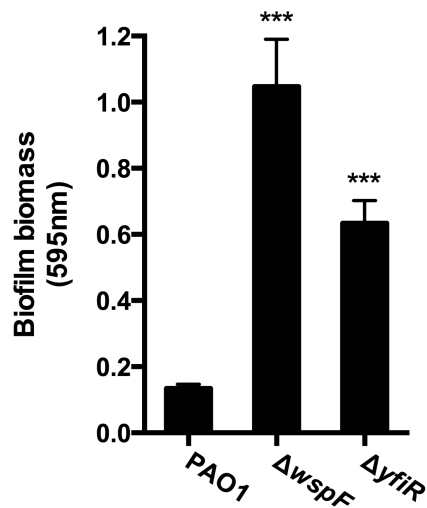

**Figure S2. Crystal violet assay for biofilm quantification.**

*P. aeruginosa* strain PAO1 wild type,  $\Delta wspF$ , and  $\Delta yfiR$  grown in a 96-well microtiter dish in VBMM. Biofilm formation was quantified after 8 hours by Crystal Violet staining. All measurements represent at least 2 biological experiments with at least 8 technical replicates. Error bars indicate SD. Statistical significance ( $P \leq 0.001$ ) is indicated with three asterisks.

Figure S3

A

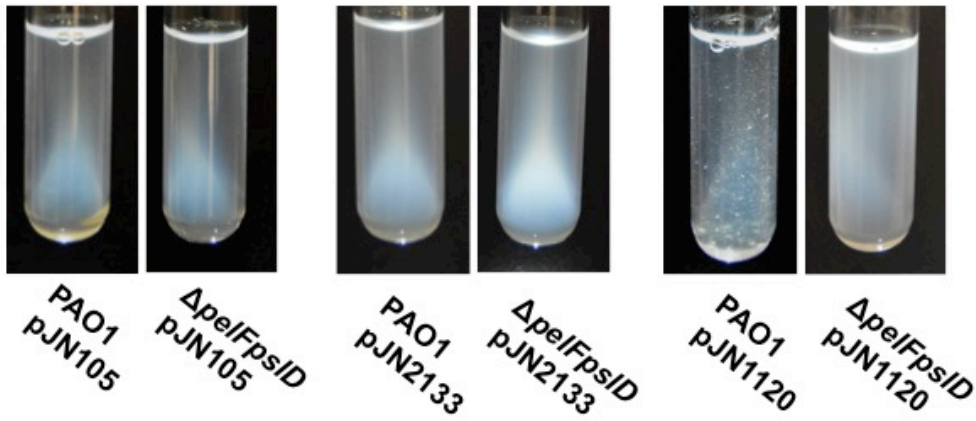

B

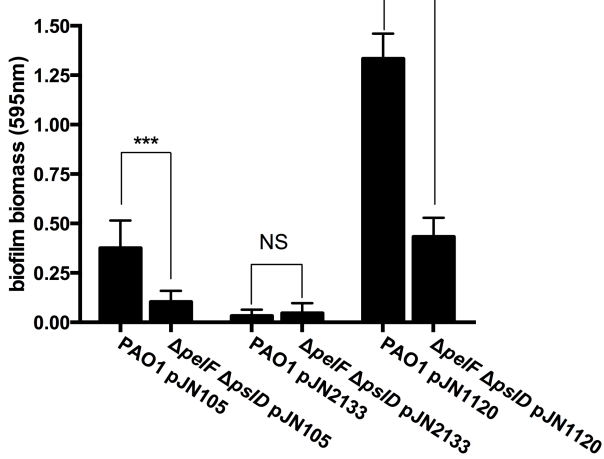

Figure S3. Loss of aggregation by *pel* and *psl* deletion.

*P. aeruginosa* PAO1 wild type and the double mutant strain  $\Delta pelF\Delta pslD$ . Cells were transformed with the three plasmids: pJN105 (vector control), pJN2133 (PDE) and pJN1120 (DGC). Cell-cell aggregation was visualized during planktonic growth (A). Biofilm formation was quantified after 8 hours by Crystal Violet staining (B). All measurements represent at least 2 biological experiments with at least 8 technical replicates. Error bars indicate SD of the mean. Statistical significance ( $P \leq 0.001$ ) is indicated with three asterisks.

**Figure S4**

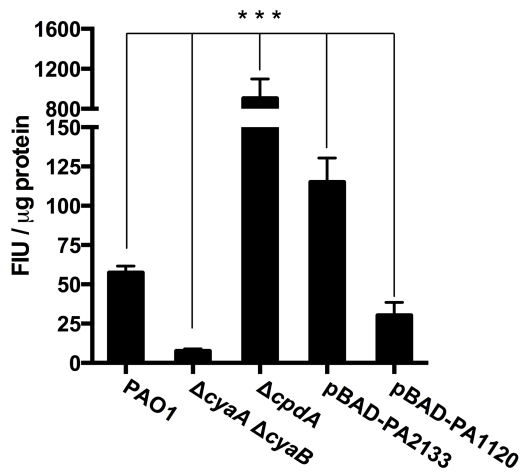

**Figure S4. Verification of fluorescent cAMP reporter.**

A new GFP based transcriptional reporter was created to follow cAMP-Vfr signaling in real time. The cAMP monitor (pUCp22GW::lacP1-GFP(ASV)) was verified experimentally in a series of knock-out mutants. Reporter activity was tested in a wild type PAO1,  $\Delta\text{cyaA}\Delta\text{cyaB}$  (no cAMP),  $\Delta\text{cpdA}$  (high cAMP), pBAD-PA2133 (chromosomal expression of PA2133 PDE), and pBAD-PA1120 (chromosomal expression of PA1120 DGC). All measurements represent at least 2 biological experiments with at least 8 technical replicates Error bars indicate SD of the mean. Statistical significance ( $P \leq 0.001$ ) is indicated with three asterisks.

**Figure S5**

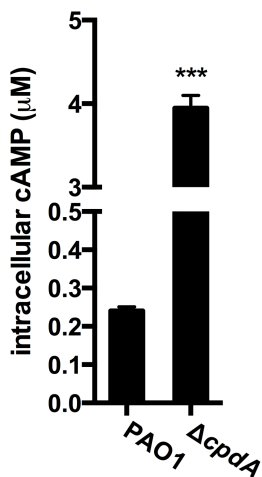

**Figure S5. Intracellular cAMP concentration of cpdA mutant**

Intracellular cAMP levels of a  $\Delta\text{cpdA}$  strain were measured using EIA. All measurements were standardized to the total protein content. Bars indicate SD of the mean. Statistical significance ( $P \leq 0.001$ ) is indicated with three asterisks.

Figure S6

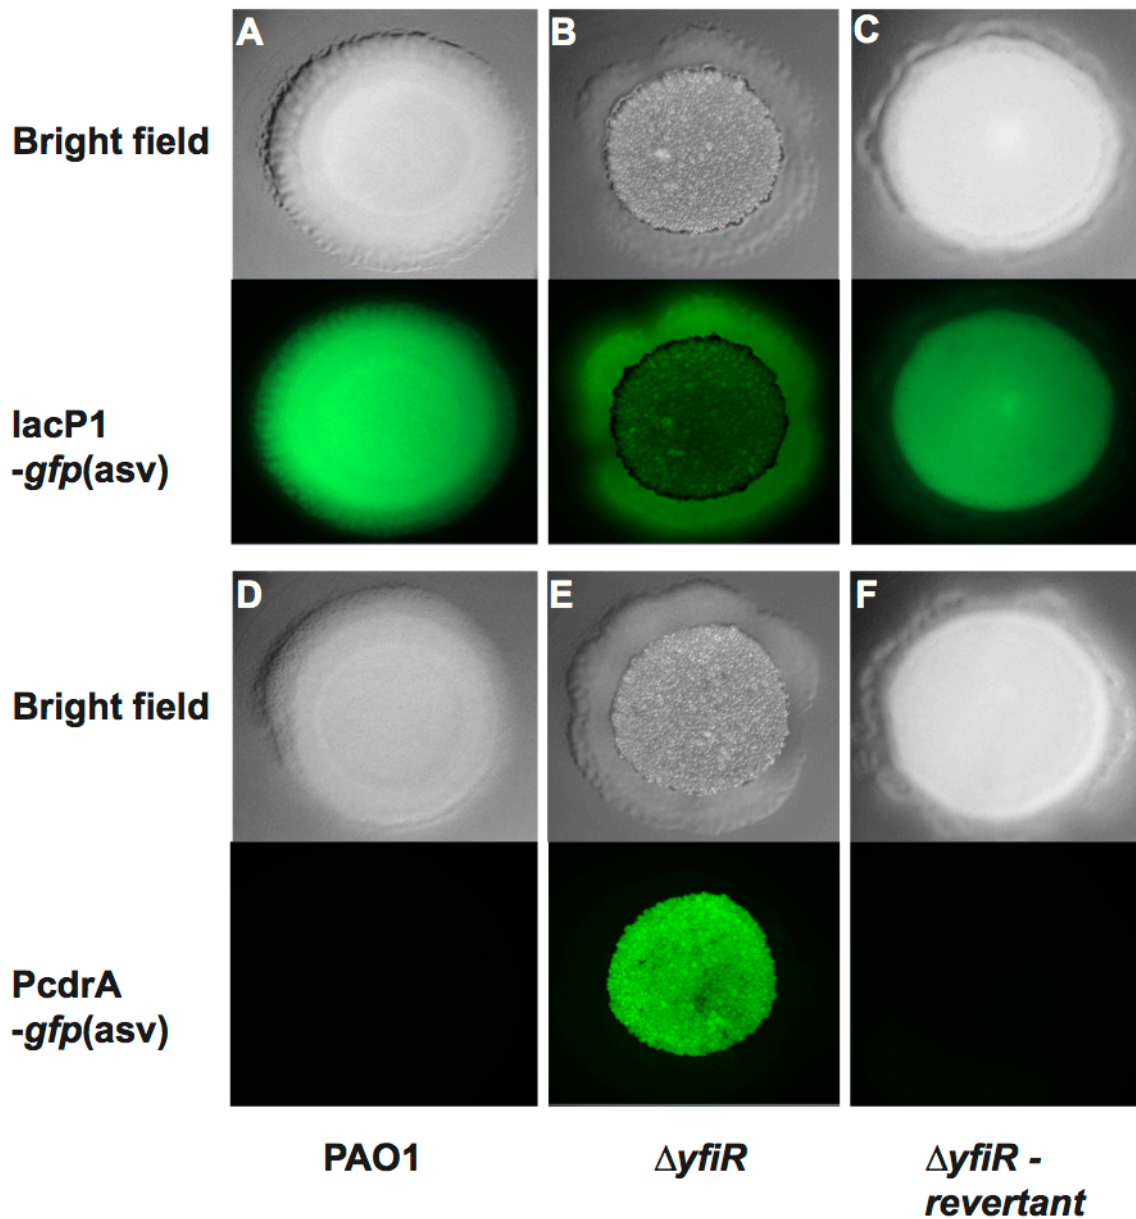

Figure S6. Phenotypic reversion of RSCVs cause a regain of cAMP-Vfr signaling. (GFP)

c-di-GMP signaling and Vfr-cAMP signaling were monitored for several days on CR agar plates using fluorescent transcriptional reporters. Images were obtained after 4 days of growth at RT. Vfr-cAMP signaling was monitored using the cAMP GFP biosensor for wild type PAO1 (A),  $\Delta yfiR$  (B) and a reverted  $\Delta yfiR$  strain (C). C-di-GMP signaling was also monitored using the c-di-GMP GFP biosensor for wild type PAO1 (D),  $\Delta yfiR$  (E) and a reverted  $\Delta yfiR$  strain (F).

**Table S1. Bacterial strains.**

| Strain                            | Genotype, description or relevant characteristics                                                                                                                                               | Source              |
|-----------------------------------|-------------------------------------------------------------------------------------------------------------------------------------------------------------------------------------------------|---------------------|
| <i>Escherichia coli</i>           |                                                                                                                                                                                                 |                     |
| NEB5 $\alpha$                     | fhuA2 $\Delta$ (argF-lacZ)U169 phoA glnV44 $\Phi$ 80 $\Delta$ (lacZ)M15 gyrA96 recA1 relA1 endA1 thi-1 hsdR17                                                                                   | New England Biolabs |
| ccdB Survival 2 <sup>TM</sup> T1R | Str <sup>r</sup> , F- mcrA $\Delta$ (mrr-hsdRMS-mcrBC) $\Phi$ 80lacZ $\Delta$ M15 $\Delta$ lacX74 recA1 ara $\Delta$ 139 $\Delta$ (ara-leu)7697 galU galK rpsL endA1 nupG fhuA::IS2             | Invitrogen          |
| DB3.1 <sup>TM</sup>               | F- gyrA462 endA1 glnV44 $\Delta$ (sr1-recA) mcrB mrr hsdS20(r <sub>B</sub> <sup>-</sup> , m <sub>B</sub> <sup>-</sup> ) ara14 galK2 lacY1 proA2 rpsL20(Sm <sup>r</sup> ) xyl5 $\Delta$ leu mtl1 | Invitrogen          |
| S17.1                             | Str <sup>r</sup> , Tet <sup>r</sup> , F- RP4-2-Tc::Mu aphA::Tn7 recA $\lambda$ pir lysogen                                                                                                      | [57]                |
| <i>Pseudomonas aeruginosa</i>     |                                                                                                                                                                                                 |                     |
| JJH0                              | PAO1 wild type strain originating from the laboratory of Dr. Colin Manoil (MPAO1)                                                                                                               | [58]                |
| PAO1 $\Delta$ wspF                | MPAO1 $\Delta$ wspF                                                                                                                                                                             | [17]                |
| PAO1 $\Delta$ yfiR                | PAO1 $\Delta$ yfiR                                                                                                                                                                              | [18]                |
| JJH402                            | JJH0 $\Delta$ cyaA                                                                                                                                                                              | This study          |
| JJH405                            | JJH0 $\Delta$ cyaB                                                                                                                                                                              | This study          |
| JJH421                            | JJH0 $\Delta$ cyaA $\Delta$ cyaB                                                                                                                                                                | This study          |
| JJH412                            | JJH0 $\Delta$ cpdA                                                                                                                                                                              | This study          |
| JJH498                            | JJH0 $\Delta$ pslD                                                                                                                                                                              | [59]                |
| JJH502                            | JJH0 $\Delta$ pelF $\Delta$ pslD                                                                                                                                                                | This study          |
| JJH628                            | JJH0 $\Delta$ chpA                                                                                                                                                                              | This study          |
| HA67                              | JJH0 $\Delta$ pelF $\Delta$ pslD $\Delta$ chpA                                                                                                                                                  | This study          |
| JJH469                            | JJH0 $\Delta$ vfr                                                                                                                                                                               | This study          |
| JJH431                            | JJH0 attCTX::lacP1-lacZ                                                                                                                                                                         | This study          |
| JJH436                            | PAO1 $\Delta$ wspF attCTX::lacP1-lacZ                                                                                                                                                           | This study          |
| HA225                             | PAO1 $\Delta$ yfiR attCTX::lacP1-lacZ                                                                                                                                                           | This study          |
| JJH439                            | JJH0 $\Delta$ cyaA attCTX::lacP1-lacZ                                                                                                                                                           | This study          |

|        |                                                                                                        |            |
|--------|--------------------------------------------------------------------------------------------------------|------------|
| JJH440 | JJH0 $\Delta$ <i>cyaB</i> attCTX::lacP1-lacZ                                                           | This study |
| JJH525 | JJH0 $\Delta$ <i>cyaA</i> $\Delta$ <i>cyaB</i> attCTX::lacP1-lacZ                                      | This study |
| JJH441 | JJH0 $\Delta$ <i>cpdA</i> attCTX::lacP1-lacZ                                                           | This study |
| HA24   | JJH0 $\Delta$ <i>pelF</i> $\Delta$ <i>pslD</i> attCTX::lacP1-lacZ                                      | This study |
| HA89   | JJH0 $\Delta$ <i>chpA</i> attCTX::lacP1-lacZ                                                           | This study |
| HA345  | JJH0 $\Delta$ <i>cyaA</i> $\Delta$ <i>cyaB</i> attCTX::lacP1-lacZ attTn7::araC-pBAD-RBSII- <i>cyaA</i> | This study |
| HA346  | JJH0 $\Delta$ <i>cyaA</i> $\Delta$ <i>cyaB</i> attCTX::lacP1-lacZ attTn7::araC-pBAD-RBSII- <i>cyaB</i> | This study |
| HA165  | JJH0 attCTXT2.1.GW:: <i>P<sub>trc</sub></i> -GFP                                                       | This study |
| HA147  | JJH0 attCTXT2.1.GW:: <i>P<sub>trc</sub></i> -mCherry                                                   | This study |

---

Str, streptomycin; Tet, tetracycline

**Table S2. Plasmids**

| Plasmid                                      | Description or relevant characteristics                                                                                                                                                                                                        | Source     |
|----------------------------------------------|------------------------------------------------------------------------------------------------------------------------------------------------------------------------------------------------------------------------------------------------|------------|
| <b>Helper plasmids</b>                       |                                                                                                                                                                                                                                                |            |
| pFLP2                                        | Ap <sup>r</sup> , site-specific excision vector                                                                                                                                                                                                | [55]       |
| pTNS1                                        | Ap <sup>r</sup> , helper plasmid expressing <i>tnsABCD</i>                                                                                                                                                                                     | [60]       |
| <b>Cloning and shuttle vectors</b>           |                                                                                                                                                                                                                                                |            |
| pJN105                                       | Gm <sup>r</sup> , araC- <i>P</i> <sub>BAD</sub> cassette cloned into pBBR1MCS-5                                                                                                                                                                | [61]       |
| pJN1120                                      | Gm <sup>r</sup> , pJN105 with PA1120 inserted in MCS                                                                                                                                                                                           | [62]       |
| pJN2133                                      | Gm <sup>r</sup> , pJN105 with PA2133 inserted in MCS                                                                                                                                                                                           | [17]       |
| pJNcyaB                                      | Gm <sup>r</sup> , pJN105 with RBSII- <i>cyaB</i> inserted in MCS                                                                                                                                                                               | This study |
| pJNcyaA                                      | Gm <sup>r</sup> , pJN105 with RBSII- <i>cyaA</i> inserted in MCS                                                                                                                                                                               | This study |
| miniCTX2                                     | Tet <sup>r</sup> , integration proficient vector                                                                                                                                                                                               | [63]       |
| pQE30:: <i>cyaB</i> 217-463                  | Amp <sup>r</sup> , Cm <sup>r</sup> , pQE30 plasmid with the catalytic domain of CyaB (residues 217-463) in the MCS.                                                                                                                            | [41]       |
| <b>Gateway donor and destination vectors</b> |                                                                                                                                                                                                                                                |            |
| pDONR221                                     | Kn <sup>r</sup> , Cm <sup>r</sup> , donor vector for Gateway® cloning                                                                                                                                                                          | Invitrogen |
| pDONR221P1P5r                                | Kn <sup>r</sup> , Cm <sup>r</sup> , donor vector for multisite Gateway® cloning                                                                                                                                                                | Invitrogen |
| pDONR221P2P5                                 | Kn <sup>r</sup> , Cm <sup>r</sup> , donor vector for multisite Gateway® cloning                                                                                                                                                                | Invitrogen |
| pDONRPEX18Gm                                 | Gm <sup>r</sup> , Cm <sup>r</sup> , allelic exchange vector with Gateway® donor site                                                                                                                                                           | [54])      |
| pEX18GmGW                                    | Gm <sup>r</sup> , Cm <sup>r</sup> , allelic exchange vector with Gateway® destination site                                                                                                                                                     | [27]       |
| pUC18-miniTn7T2.1-Gm-GW                      | Gm <sup>r</sup> , Cm <sup>r</sup> , Ap <sup>r</sup> , <i>aacC1</i> on miniTn7 based vector with transcriptional terminators at the left and right ends of the Tn7 transposon; Gateway® destination vector                                      | [59]       |
| pMH487                                       | Gm <sup>r</sup> , Ap <sup>r</sup> , pUCp22Not containing RNase III splice site and GFP (mut3*)                                                                                                                                                 | [36]       |
| pUCP22T2.1-GW                                | Gm <sup>r</sup> , Cm <sup>r</sup> , Ap <sup>r</sup> , <i>colE1</i> origin of replication, <i>bla</i> and <i>rep</i> from pUCP22, ligated to the Gateway destination fragment from pUC18-miniTn2T2.1-Gm-GW; contains M13 priming sites flanking | This study |

*attR1* and *attR2*

|                 |                                                                                                                                                                             |            |
|-----------------|-----------------------------------------------------------------------------------------------------------------------------------------------------------------------------|------------|
| miniCTX2T2.1-GW | Tet <sup>r</sup> , Cm <sup>r</sup> , Ap <sup>r</sup> , miniCTX2 with transcriptional terminators at the left and right ends of the CTX element; Gateway® destination vector | This study |
|-----------------|-----------------------------------------------------------------------------------------------------------------------------------------------------------------------------|------------|

### Reporters and fluorescent protein labels

|                      |                                                                                |      |
|----------------------|--------------------------------------------------------------------------------|------|
| miniCTX::lacP1- lacZ | miniCTX: <i>lacZ</i> with the <i>E.coli</i> lacP1 promoter cloned into the MCS | [30] |
|----------------------|--------------------------------------------------------------------------------|------|

|                      |                                                               |      |
|----------------------|---------------------------------------------------------------|------|
| pUCP22Not::PcdrA-GFP | Gm <sup>r</sup> pUCP22Not-PcdrA-RBSII- <i>gfp</i> (ASV)-T0-T1 | [36] |
|----------------------|---------------------------------------------------------------|------|

|                |                                    |      |
|----------------|------------------------------------|------|
| pMKB1::mCherry | Carb <sup>r</sup> , pMKB1::mCherry | [64] |
|----------------|------------------------------------|------|

|       |                                               |            |
|-------|-----------------------------------------------|------------|
| pHA36 | Kn <sup>r</sup> , pENTR221L5L2:: <i>PexoT</i> | This study |
|-------|-----------------------------------------------|------------|

|       |                                                                                                        |            |
|-------|--------------------------------------------------------------------------------------------------------|------------|
| pHA46 | Kn <sup>r</sup> , pENTR221L1L5r:: <i>mCherry</i> , RBSII inserted upstream of the mCherry start codon. | This study |
|-------|--------------------------------------------------------------------------------------------------------|------------|

|       |                                              |            |
|-------|----------------------------------------------|------------|
| pHA50 | Kn <sup>r</sup> , pENTR221L5L2:: <i>Ptrc</i> | This study |
|-------|----------------------------------------------|------------|

|       |                                                           |            |
|-------|-----------------------------------------------------------|------------|
| pHA51 | Tet <sup>r</sup> , miniCTX2T2.1-GW:: <i>Ptrc</i> -mCherry | This study |
|-------|-----------------------------------------------------------|------------|

|       |                                                                                                     |            |
|-------|-----------------------------------------------------------------------------------------------------|------------|
| pHA60 | Kn <sup>r</sup> , pENTR221L1L5r:: <i>GFP</i> (ASV), RBSII inserted upstream of the GFP start codon. | This study |
|-------|-----------------------------------------------------------------------------------------------------|------------|

|        |                                               |            |
|--------|-----------------------------------------------|------------|
| pHA110 | Kn <sup>r</sup> , pENTR221L5L2:: <i>lacP1</i> | This study |
|--------|-----------------------------------------------|------------|

|       |                                                          |            |
|-------|----------------------------------------------------------|------------|
| pHA67 | Gm <sup>r</sup> , pUCP22T2.1-GW:: <i>lacP1</i> -GFP(ASV) | This study |
|-------|----------------------------------------------------------|------------|

|       |                                               |            |
|-------|-----------------------------------------------|------------|
| pHA69 | Kn <sup>r</sup> , pENTR221L5L2:: <i>PptxR</i> | This study |
|-------|-----------------------------------------------|------------|

|       |                                                          |            |
|-------|----------------------------------------------------------|------------|
| pHA75 | Gm <sup>r</sup> , pUCP22T2.1-GW:: <i>PexoT</i> -GFP(ASV) | This study |
|-------|----------------------------------------------------------|------------|

|       |                                                          |            |
|-------|----------------------------------------------------------|------------|
| pHA76 | Gm <sup>r</sup> , pUCP22T2.1-GW:: <i>PptxR</i> -GFP(ASV) | This study |
|-------|----------------------------------------------------------|------------|

### Allelic exchange vectors

|         |                                           |      |
|---------|-------------------------------------------|------|
| pEX18Gm | Gm <sup>r</sup> , allelic exchange vector | [55] |
|---------|-------------------------------------------|------|

|                        |                                                                               |      |
|------------------------|-------------------------------------------------------------------------------|------|
| pEX18Gm:: <i>ΔpelF</i> | Gm <sup>r</sup> , pEX18Gm with an in-frame deletion construct for <i>pelF</i> | [65] |
|------------------------|-------------------------------------------------------------------------------|------|

|                        |                                                                               |      |
|------------------------|-------------------------------------------------------------------------------|------|
| pEX19Gm:: <i>ΔwspF</i> | Gm <sup>r</sup> , pEX19Gm with an in-frame deletion construct for <i>wspF</i> | [17] |
|------------------------|-------------------------------------------------------------------------------|------|

|        |                                                                                                                       |            |
|--------|-----------------------------------------------------------------------------------------------------------------------|------------|
| pJJH55 | Gm <sup>r</sup> , pEX18Gm with an in-frame, 678 bp deletion construct for <i>cpdA</i> inserted in MCS (EcoRI/HindIII) | This study |
|--------|-----------------------------------------------------------------------------------------------------------------------|------------|

|        |                                                                                                       |            |
|--------|-------------------------------------------------------------------------------------------------------|------------|
| pJJH57 | Gm <sup>r</sup> , pEX18Gm with an in-frame, 678 bp deletion construct for <i>cyaB</i> inserted in MCS | This study |
|--------|-------------------------------------------------------------------------------------------------------|------------|



|                        |                                                                                                                              |            |
|------------------------|------------------------------------------------------------------------------------------------------------------------------|------------|
|                        | (EcoRI/HindIII)                                                                                                              |            |
| pJH61                  | Gm <sup>r</sup> , pEX18Gm with an in-frame, 907 bp deletion construct for <i>cyaA</i> inserted in MCS (EcoRI/HindIII)        | This study |
| pJH107                 | Gm <sup>r</sup> , pEX18GW with an in-frame, 516 bp deletion construct for <i>vfr</i>                                         | This study |
| pJH206                 | Gm <sup>r</sup> , pDONRPEX18Gm with an in-frame, 1170 bp deletion construct for <i>chpA</i>                                  | This study |
| <b>miniTn7 vectors</b> |                                                                                                                              |            |
| pUC18-miniTn7T-Gm      | Ap <sup>r</sup> , Gm <sup>r</sup> , cloning vector for gene insertion in Gm <sup>s</sup> bacteria                            | [60]       |
| pHA59                  | Ap <sup>r</sup> , Gm <sup>r</sup> , pUC18-miniTn7T-Gm with araC-pBAD-RBSII- <i>cyaB</i> fragment inserted in MCS (KpnI/PstI) | This study |
| pHA104                 | Ap <sup>r</sup> , Gm <sup>r</sup> , pUC18-miniTn7T-Gm with araC-pBAD-RBSII- <i>cyaA</i> fragment inserted in MCS (KpnI/SacI) | This study |

---

Ap, ampicillin; Cm, chloramphenicol; Kn, kanamycin; Gm, Gentamicin; Tet, tetracycline

**Table S3. Primers.**

| <b>Oligonucleotide</b>                                                         | <b>DNA sequence*</b>                                                                      |
|--------------------------------------------------------------------------------|-------------------------------------------------------------------------------------------|
| <b>DNA sequencing and verification of deletion or insertion mutations</b>      |                                                                                           |
| M13F (-21)                                                                     | <u>TGT AAA ACG ACG GCC AGT</u>                                                            |
| M13R                                                                           | <u>CAG GAA ACA GCT ATG AC</u>                                                             |
| HA61_pelFseqUp                                                                 | <u>TAC TGG GAA CTG GCC TA</u>                                                             |
| HA62_pelFseqDown                                                               | <u>AAA TGA AGC GGG TGA AGA</u>                                                            |
| JJH881_pUCP22repF01-SEQ                                                        | <u>CAA GGT CAC ACA TCT GTT G</u>                                                          |
| JJH894_DestGWR01readout-SEQ                                                    | <u>CTG CTG TCA GAT AAA GTC TCC</u>                                                        |
| JJH895_DestGWF01readout-SEQ                                                    | <u>GCT TCC TTA GCT CCT GAA AAT C</u>                                                      |
| JJH926_pUCP22T1R01-SEQ                                                         | <u>GGC GAT TAA GTT GGG TAA CG</u>                                                         |
| JJH927_pUCP22oriF01-SEQ                                                        | <u>CAC TCA AAG GCG GTA ATA CG</u>                                                         |
| JJH928_pUCP22blaF01-SEQ                                                        | <u>CGA TCG TTG TCA GAA GTA AG</u>                                                         |
| JJH929_pUCP22aacC1F01-SEQ                                                      | <u>GTT AGG TGG CGG TAC TTG G</u>                                                          |
| JJH930_pUCP22backboneF01-SEQ                                                   | <u>CTT CAG GGG CAC AAA TGC G</u>                                                          |
| JJH931_GWDestFragcatF01-SEQ                                                    | <u>GTG ATG GCT TCC ATG TCG G</u>                                                          |
| <b>Construction of shuttle vectors (pJNcyaA and pJNcyaB)</b>                   |                                                                                           |
| cyaB-up-EcoRI-RBSII                                                            | ATC CGG <b>GAA TTC</b> AAA GAG GAG AAA <u>ATG AAG CCT</u><br><u>ACC CTC CC</u>            |
| cyaB-dn-pstI                                                                   | ATC CGG <b>CTG CAG</b> <u>TTA GAG GAT GAC CTTG TCG</u>                                    |
| cyaA-RBSII-NheI                                                                | CGC <b>CGC TAG CAA</b> AGA GGA GAA <u>AAT GAA CCG ACA</u><br><u>CCC CGC A</u>             |
| cyaA-SacI                                                                      | CGT <b>CGA GCT CTC</b> ATT GTT CCA GCA GCG CC                                             |
| <b>Construction of destination vectors (pUCP22T2.1-GW and miniCTX2T2.1-GW)</b> |                                                                                           |
| JJH876_pMH487-T1-F01                                                           | ATC CGG <b>AAG CTT</b> <u>GCA GTT ATT GGT GCC CTT AAA</u><br><u>C</u>                     |
| JJH878_pMH487-rep-M13R-R01                                                     | ATC CGG <b>AAG CTT</b> gtc ata gct gtt tcc tgT <u>CAG</u><br><u>TTG CGC AGC CTG AAA G</u> |
| JJH879_miniTn72.1-attR1-F01                                                    | ATC CGG <b>AAG CTT</b> <u>GTT GGC CTG CAA GGC CTT C</u>                                   |

JJH880\_miniTn72.1-attR2-R01      ATC CCG **AAG CTT** GCA GGA ATT CCT CGA GAA GC

### Construction of promoter-reporter and labeling vectors

P<sub>trc</sub>-attB2-fwr      GGG **GAC CAC TTT GTA CAA GAA AGC TGG GTA GAC**  
GGA TCC GGG GAA TT

P<sub>trc</sub>-attB5-rev      GGG **GAC AAC TTT GTA TAC AAA AGT TGC CCT CCT**  
CTA GAC TGC AGC

mCherry-RBSII-attB5r-fwr      GGG **GAC AAC TTT TGT ATA CAA AGT TGT CAG TCT**  
AGA GGA GAA AAA AAA ATG

mCherry-attB1-rev      GGG **GAC AAG TTT GTA CAA AAA AGC AGG CTC TTA**  
CTT GTA CAG CTC GTC C

attB2-lacP1-fwr2      GGG **GAC CAC TTT GTA CAA GAA AGC TGG GTA GCC**  
CAA TAC GCA AAC CG

attB5-lacP1-rev2      GGG **GAC AAC TTT GTA TAC AAA AGT TGC CCG AAA**  
GGG GGA TGT GC

attB2-PexoT-fwr      GGG **GAC CAC TTT GTA CAA GAA AGC TGG GTA GGC**  
GAC GTG CCT GTG C

attB5-PexoT-rev      GGG **GAC AAC TTT GTA TAC AAA AGT TGC CCA TGA**  
TTG ACG TCT CCT GAT G

attB2-PptxR-fwr      GGG **GAC CAC TTT GTA CAA GAA AGC TGG GTA GCT**  
GAA ACT TAT GCG CG

attB5-PptxR-rev      GGG **GAC AAC TTT GTA TAC AAA AGT TGC CCC TGT**  
CAT TCC TTA GCC

### Construction of allelic exchange vectors with in-frame deletion alleles

JJH297\_PA4969upF1      ATC CCG **AAG CTT** GCT GAT GGC GAT CTA TCC

JJH298\_PA4969upR1      GGC ATG TCA GTA TCC GGC GGT GTC GTT CGA ATG  
GCG TGA CAA

JJH299\_PA4969downF1      GAC ACC GCC GGA TAC TG

JJH300\_PA4969downR1      ATC CCG **GAA TTC** CCT GCC GTG GGT GAT G

JJH329\_cyaBupF1      ATC CCG **AAG CTT** CAA GTA CCC GCT GTG GTC

JJH330\_cyaBupR1      AAC TTA GAG GAT GAC CTT GTC GCG GAC GGA CCG  
GCT CGT C

JJH331\_cyaBdownF1      CGC GAC AAG GTC ATC CTC

JJH332\_cyaBdownR1      ATC CCG **GAA TTC** CTC GGT GCT GGT GTT CC

|                         |                                                                                           |
|-------------------------|-------------------------------------------------------------------------------------------|
| JJH341_cyaAupF2         | ATC CCG <b>AAG CTT</b> <u>CTA GTC CAA CTA CAC TCA C</u>                                   |
| JJH342_cyaAupR2         | <i>CAG CGC CTG GTT CAG CGC CGT TTC</i> <u>GAC CTT GCG</u><br><u>GTC GAT GC</u>            |
| JJH343_cyaAdownF2       | <u>GAA ACG GCG CTG AAC CAG</u>                                                            |
| JJH344_cyaAdownR2       | ATC CCG <b>GAA TTC</b> <u>GCG TAT GGT GGA GGA AGC</u>                                     |
| JJH381_vfrupF3-GWB1     | GGG <b>GAC AAG TTT GTA CAA AAA AGC AGG CTC</b> <u>GCA</u><br><u>AAG GGC GCC AGC TTA G</u> |
| JJH334_vfrupR2          | <i>TGC TGT TCA GCG GGT GCC GAA GAC</i> <u>GTG GGT AAT</u><br><u>AGC TAC CAT G</u>         |
| JJH345_vfrdownF2        | <u>GTC TTC GGC ACC CGC T</u>                                                              |
| JJH382_vfrdownR3-GWB2   | GGG <b>GAC CAC TTT GTA CAA GAA AGC TGG GTG</b> <u>GGT</u><br><u>ATT CTC AAC CGG GC</u>    |
| JJH892_chpAupF04-GWB1   | GGG GAC AAG TTT GTA CAA AAA AGC AGG CTC <u>CCT</u><br><u>ACT CGC TGG CGA TGT G</u>        |
| JJH845_chpAupR02        | <i>CGC GCT CAC TCA TGC TGG CCG ACC</i> <u>TCG CCT TTC</u><br><u>ACC CAC TCC</u>           |
| JJH846_chpAdownF02      | <u>GTC GGC CAG CAT GAG TGA G</u>                                                          |
| JJH893_chpAdownR04-GWB2 | GGG GAC CAC TTT GTA CAA GAA AGC TGG GTA <u>CAT</u><br><u>GCC ACT GGC TGT GCC</u>          |

---

\* Regions of homology to the target amplicons are underlined, regions of reverse complementarity are *italicized*, and restriction sites and Gateway attB1 and attB2 sequences are in **bold**.
